# Supplementary material
Source: PubMed Central journal article supplement (PMC7573438)
Supplement: IAI.00389-20-s0001.pdf [file IAI.00389-20-s0001.pdf]

**Table S1** Pathological scoring of murine spleens infected by *B. melitensis* M28 and its derivatives. Scores were given by at least two pathologists in a blinded manner, and range from 0 to 3: 0, normal (no pathology, similar/equivalent to the uninfected group); 1, mild pathological change; 2, moderate pathological change; 3, severe pathological change.

|                                      | <b>Uninfected</b> | <b>M28</b>                | <b>M28<math>\Delta</math>tatA</b>       | <b>M28<math>\Delta</math>tatA pBBRtatA</b> |
|--------------------------------------|-------------------|---------------------------|-----------------------------------------|--------------------------------------------|
| White pulp to red pulp ratio         | ~1:1              | Markedly reduced, (2-3)   | No change, (0)                          | Reduced, (1)                               |
| Average lymphoid follicles per field | ~10               | Reduced, (2)              | No change, (0)                          | Reduced, (2)                               |
| Size of follicles                    | Normal            | Reduced, (1)              | Minimal change, (0-1)                   | Reduced, (2)                               |
| Marginal zone depletion              | Normal            | Increased, (2)            | Minimal to moderately increased,<br>(1) | Markedly increased, (3)                    |
| Extramedullary hematopoiesis         | Minimal           | Moderately increased, (2) | Minimal, (0-1)                          | Moderately increased, (2)                  |
| Granulomas                           | Absent            | Frequent, (3)             | Absent, (0)                             | Frequent, (2-3)                            |
| Brucella immunoreactivities          | Absent            | Frequent, (3)             | Rare, (1)                               | Frequent, (2-3)                            |

**Table S2 Putative Tat-substrates predicted by TAT-P.**

| <b>M28 locus tag</b>     | <b>Product</b>                                               | <b>Note</b>                                               |
|--------------------------|--------------------------------------------------------------|-----------------------------------------------------------|
| _locus_tag_BM28_RS00045_ | ABC transporter substrate-binding protein                    | Four yes<br>Found RRHFM as Tat motif starting at pos. 8   |
| _locus_tag_BM28_RS00235_ | hypothetical protein                                         | Three yes<br>Found RRRFL as Tat motif starting at pos. 10 |
| _locus_tag_BM28_RS00330_ | hypothetical protein                                         | Four yes<br>Found RRMVT as Tat motif starting at pos. 10  |
| _locus_tag_BM28_RS00655_ | L,D-transpeptidase                                           | Three yes<br>Found RRQVV as Tat motif starting at pos. 56 |
| _locus_tag_BM28_RS01600_ | CAP domain-containing protein                                | Five yes<br>Found RRGFL as Tat motif starting at pos. 11  |
| _locus_tag_BM28_RS01755_ | twin-arginine translocation signal domain-containing protein | Five yes<br>Found RRSFL as Tat motif starting at pos. 7   |
| _locus_tag_BM28_RS02425_ | DsbA family protein                                          | Four yes<br>Found RRHVI as Tat motif starting at pos. 7   |
| _locus_tag_BM28_RS02635_ | ABC transporter substrate-binding protein                    | Three yes<br>Found RRNLM as Tat motif starting at pos. 2  |
| _locus_tag_BM28_RS02950_ | hypothetical protein                                         | Four yes<br>Found RRKAL as Tat motif starting at pos. 73  |
| _locus_tag_BM28_RS03675_ | murein L,D-transpeptidase                                    | Five yes<br>Found RRRFL as Tat motif starting at pos. 15  |
| _locus_tag_BM28_RS04380_ | M48 family peptidase                                         | Four yes<br>Found RRIFV as Tat motif starting at pos. 95  |
| _locus_tag_BM28_RS05450_ | L,D-transpeptidase                                           | Five yes<br>Found RRILL as Tat motif starting at pos. 4   |
| _locus_tag_BM28_RS05715_ | TAXI family TRAP transporter solute-binding subunit_         | Four yes<br>Found RRLAV as Tat motif starting at pos. 8   |
| _locus_tag_BM28_RS05780_ | 50S ribosomal protein L17                                    | Four yes<br>Found RRQAI as Tat motif starting at pos. 63  |
| _locus_tag_BM28_RS10140_ | apolipoprotein N-acyltransferase                             | Five yes<br>Found RRLLL as Tat motif starting at pos. 65  |
| _locus_tag_BM28_RS11540_ | nitrous-oxide reductase                                      | Five yes~<br>Found RRQLL as Tat motif starting at pos. 12 |
| _locus_tag_BM28_RS11570_ | thiamine biosynthesis protein ApbE                           | Five yes~<br>Found RRRVL as Tat motif starting at pos. 5  |
| _locus_tag_BM28_RS12380_ | ABC transporter substrate-binding protein                    | Five yes<br>Found RRQAL as Tat motif starting at pos. 30  |
| _locus_tag_BM28_RS12730_ | hypothetical protein                                         | Five yes<br>Found RRAVM as Tat motif starting at pos. 13  |
| _locus_tag_BM28_RS13455_ | multicopper oxidase CueO                                     | Five yes<br>Found RRRL as Tat motif starting at pos. 6    |
| _locus_tag_BM28_RS13760_ | Hint domain-containing protein                               | Five yes<br>Found RRHFL as Tat motif starting at pos. 15  |
| _locus_tag_BM28_RS13965_ | extracellular solute-binding protein                         | Four yes<br>Found RRQAL as Tat motif starting at pos. 5   |
| _locus_tag_BM28_RS14670_ | MetQ_NlpA family ABC transporter                             | Five yes                                                  |

|                          |                                                                      |                                                           |
|--------------------------|----------------------------------------------------------------------|-----------------------------------------------------------|
|                          | substrate-binding protein                                            | Found RRAGL as Tat motif starting at pos. 12              |
| _locus_tag_BM28_RS14815_ | protein-methionine-sulfoxide reductase<br>catalytic subunit MsrP     | Five yes<br>Found RREFM as Tat motif starting at pos. 28  |
| _locus_tag_BM28_RS14970_ | 50S ribosomal protein L34                                            | Three yes<br>Found RRHGF as Tat motif starting at pos. 14 |
| _locus_tag_BM28_RS15630_ | D-xylose ABC transporter<br>substrate-binding protein                | Four yes<br>Found RRNFL as Tat motif starting at pos. 3   |
| _locus_tag_BM28_RS00220_ | SH3 domain-containing protein                                        | Four yes                                                  |
| _locus_tag_BM28_RS00240_ | hypothetical protein                                                 | Five yes                                                  |
| _locus_tag_BM28_RS00310_ | lytic transglycosylase domain-containing<br>protein                  | Four yes                                                  |
| _locus_tag_BM28_RS00345_ | invasion associated locus B family<br>protein                        | Three yes                                                 |
| _locus_tag_BM28_RS16010_ | hypothetical protein                                                 | Three yes                                                 |
| _locus_tag_BM28_RS00740_ | organic solvent tolerance protein OstA                               | Five yes                                                  |
| _locus_tag_BM28_RS16050_ | hypothetical protein                                                 | Five yes                                                  |
| _locus_tag_BM28_RS00840_ | YraN family protein                                                  | Three yes                                                 |
| _locus_tag_BM28_RS00885_ | BA14K family protein_                                                | Five yes                                                  |
| _locus_tag_BM28_RS00945_ | sigma-54-dependent Fis family<br>transcriptional regulator           | Four yes                                                  |
| _locus_tag_BM28_RS01135_ | SDR family oxidoreductase                                            | Four yes                                                  |
| _locus_tag_BM28_RS01500_ | esterase                                                             | Four yes                                                  |
| _locus_tag_BM28_RS01515_ | multidrug efflux RND transporter<br>periplasmic adaptor subunit BepD | Five yes                                                  |
| _locus_tag_BM28_RS01730_ | invasion associated locus B family<br>protein                        | Five yes                                                  |
| _locus_tag_BM28_RS01770_ | hypothetical protein                                                 | Four yes                                                  |
| _locus_tag_BM28_RS01860_ | DsbA family protein                                                  | Five yes                                                  |
| _locus_tag_BM28_RS01890_ | peptide antibiotic transporter SbmA                                  | Three yes                                                 |
| _locus_tag_BM28_RS02075_ | enoyl-_acyl-carrier-protein_ reductase<br>FabI                       | Four yes                                                  |
| _locus_tag_BM28_RS02140_ | DUF937 domain-containing protein                                     | Four yes                                                  |
| _locus_tag_BM28_RS02250_ | 3-oxoacyl-_acyl-carrier-protein_<br>reductase                        | Three yes                                                 |
| _locus_tag_BM28_RS16245_ | hypothetical protein                                                 | Three yes                                                 |
| _locus_tag_BM28_RS02285_ | invasion associated locus B family<br>protein                        | Five yes                                                  |
| _locus_tag_BM28_RS02290_ | cytochrome c oxidase subunit II                                      | Four yes                                                  |
| _locus_tag_BM28_RS02360_ | sensor domain-containing<br>phosphodiesterase                        | Four yes                                                  |
| _locus_tag_BM28_RS02460_ | DUF1499 domain-containing protein                                    | Three yes                                                 |
| _locus_tag_BM28_RS16315_ | hypothetical protein                                                 | Three yes                                                 |
| _locus_tag_BM28_RS02645_ | Gfo_Idh_MocA family oxidoreductase                                   | Three yes                                                 |
| _locus_tag_BM28_RS02810_ | DUF1491 family protein                                               | Three yes                                                 |
| _locus_tag_BM28_RS16335_ | phage tail assembly chaperone                                        | Five yes                                                  |
| _locus_tag_BM28_RS02960_ | cytochrome c biogenesis protein CcmE                                 | Three yes                                                 |
| _locus_tag_BM28_RS02975_ | DegQ family serine endoprotease                                      | Three yes                                                 |
| _locus_tag_BM28_RS03075_ | hypothetical protein                                                 | Five yes                                                  |

|                          |                                                         |           |
|--------------------------|---------------------------------------------------------|-----------|
| _locus_tag_BM28_RS03080_ | DUF423 domain-containing protein                        | Four yes  |
| _locus_tag_BM28_RS03205_ | GTPase Era                                              | Three yes |
| _locus_tag_BM28_RS03350_ | META domain-containing protein                          | Four yes  |
| _locus_tag_BM28_RS03390_ | ribonuclease T_2                                        | Three yes |
| _locus_tag_BM28_RS03395_ | phage portal protein                                    | Four yes  |
| _locus_tag_BM28_RS03415_ | DUF992 domain-containing protein                        | Four yes  |
| _locus_tag_BM28_RS03445_ | hypothetical protein                                    | Four yes  |
| _locus_tag_BM28_RS03450_ | SDR family oxidoreductase                               | Five yes  |
| _locus_tag_BM28_RS03570_ | hypothetical protein                                    | Four yes  |
| _locus_tag_BM28_RS03660_ | enoyl-CoA hydratase_isomerase family protein            | Three yes |
| _locus_tag_BM28_RS03715_ | outer membrane protein assembly factor BamE             | Four yes  |
| _locus_tag_BM28_RS03760_ | undecaprenyl-phosphate glucose phosphotransferase       | Three yes |
| _locus_tag_BM28_RS03770_ | polysaccharide export protein                           | Four yes  |
| _locus_tag_BM28_RS03850_ | hypothetical protein_                                   | Four yes  |
| _locus_tag_BM28_RS03915_ | NADH-quinone oxidoreductase subunit Nuol                | Three yes |
| _locus_tag_BM28_RS03970_ | lipoprotein-releasing ABC transporter permease subunit  | Four yes  |
| _locus_tag_BM28_RS04075_ | VOC family protein                                      | Four yes  |
| _locus_tag_BM28_RS04270_ | hypothetical protein                                    | Five yes  |
| _locus_tag_BM28_RS16460_ | hypothetical protein                                    | Three yes |
| _locus_tag_BM28_RS04570_ | transporter substrate-binding domain-containing protein | Three yes |
| _locus_tag_BM28_RS04580_ | molybdenum cofactor guanylyltransferase                 | Five yes  |
| _locus_tag_BM28_RS04605_ | hypothetical protein                                    | Five yes  |
| _locus_tag_BM28_RS04670_ | hypothetical protein                                    | Three yes |
| _locus_tag_BM28_RS04755_ | septal ring lytic transglycosylase RlpA family protein  | Three yes |
| _locus_tag_BM28_RS04760_ | D-alanyl-D-alanine carboxypeptidase                     | Four yes  |
| _locus_tag_BM28_RS04800_ | DMT family transporter                                  | Four yes  |
| _locus_tag_BM28_RS04850_ | glutathione-disulfide reductase                         | Four yes  |
| _locus_tag_BM28_RS16540_ | D-alanyl-D-alanine carboxypeptidase_ _pseudo            | Five yes  |
| _locus_tag_BM28_RS16590_ | hypothetical protein                                    | Three yes |
| _locus_tag_BM28_RS05445_ | CTP synthase                                            | Three yes |
| _locus_tag_BM28_RS05455_ | preprotein translocase subunit SecG                     | Three yes |
| _locus_tag_BM28_RS05540_ | outer membrane protein assembly factor BamA             | Five yes  |
| _locus_tag_BM28_RS05585_ | DUF1849 family protein                                  | Five yes  |
| _locus_tag_BM28_RS05615_ | ATP-dependent Clp protease adapter ClpS                 | Three yes |
| _locus_tag_BM28_RS05760_ | OmpA family protein                                     | Three yes |
| _locus_tag_BM28_RS05810_ | 50S ribosomal protein L15                               | Three yes |
| _locus_tag_BM28_RS06100_ | hypothetical protein                                    | Four yes  |

|                          |                                                               |           |
|--------------------------|---------------------------------------------------------------|-----------|
| _locus_tag_BM28_RS06105_ | hypothetical protein                                          | Three yes |
| _locus_tag_BM28_RS06140_ | porin family protein                                          | Four yes  |
| _locus_tag_BM28_RS06170_ | hypothetical protein                                          | Four yes  |
| _locus_tag_BM28_RS06220_ | cobalt-precorrin-6A reductase                                 | Four yes  |
| _locus_tag_BM28_RS06595_ | potassium transporter Kup                                     | Three yes |
| _locus_tag_BM28_RS06640_ | DegQ family serine endoprotease                               | Five yes  |
| _locus_tag_BM28_RS06795_ | cell division protein FtsQ_DivIB                              | Three yes |
| _locus_tag_BM28_RS06820_ | putative lipid II flippase FtsW                               | Three yes |
| _locus_tag_BM28_RS06865_ | lytic transglycosylase domain-containing protein              | Three yes |
| _locus_tag_BM28_RS06890_ | lytic murein transglycosylase                                 | Five yes  |
| _locus_tag_BM28_RS06975_ | linear amide C-N hydrolase_                                   | Four yes  |
| _locus_tag_BM28_RS07015_ | SIMPL domain-containing protein                               | Four yes  |
| _locus_tag_BM28_RS07020_ | hypothetical protein                                          | Five yes  |
| _locus_tag_BM28_RS07080_ | ABC transporter ATP-binding protein_permease                  | Three yes |
| _locus_tag_BM28_RS07145_ | DUF1176 domain-containing protein                             | Four yes  |
| _locus_tag_BM28_RS07150_ | DMT family transporter                                        | Four yes  |
| _locus_tag_BM28_RS07315_ | cytochrome c1                                                 | Four yes  |
| _locus_tag_BM28_RS07345_ | hypothetical protein                                          | Four yes  |
| _locus_tag_BM28_RS07385_ | DUF1285 domain-containing protein                             | Five yes  |
| _locus_tag_BM28_RS07480_ | choline ABC transporter substrate-binding protein             | Five yes  |
| _locus_tag_BM28_RS07660_ | SDR family oxidoreductase                                     | Three yes |
| _locus_tag_BM28_RS07710_ | D-threitol dehydrogenase_ _pseudo                             | Three yes |
| _locus_tag_BM28_RS07725_ | sugar ABC transporter ATP-binding protein                     | Three yes |
| _locus_tag_BM28_RS07900_ | tonB-system energizer ExbB                                    | Five yes  |
| _locus_tag_BM28_RS07915_ | phosphodiester glycosidase family protein                     | Five yes  |
| _locus_tag_BM28_RS07935_ | efflux RND transporter periplasmic adaptor subunit            | Three yes |
| _locus_tag_BM28_RS08010_ | phosphoglucosamine mutase                                     | Three yes |
| _locus_tag_BM28_RS08050_ | protein TolR                                                  | Three yes |
| _locus_tag_BM28_RS08160_ | 5-formyltetrahydrofolate cyclo-ligase                         | Three yes |
| _locus_tag_BM28_RS07660_ | SDR family oxidoreductase                                     | Three yes |
| _locus_tag_BM28_RS08290_ | glycine zipper 2TM domain-containing protein                  | Four yes  |
| _locus_tag_BM28_RS08305_ | thiamine_thiamine pyrophosphate ABC transporter permease ThiP | Three yes |
| _locus_tag_BM28_RS08325_ | RNA polymerase factor sigma-32                                | Four yes  |
| _locus_tag_BM28_RS08380_ | 3-hydroxybutyrate dehydrogenase                               | Three yes |
| _locus_tag_BM28_RS08290_ | glycine zipper 2TM domain-containing protein                  | Four yes  |
| _locus_tag_BM28_RS08455_ | F0F1 ATP synthase subunit beta                                | Three yes |
| _locus_tag_BM28_RS08545_ | MFS transporter_ _pseudo_true                                 | Four yes  |
| _locus_tag_BM28_RS08550_ | NAD-glutamate dehydrogenase                                   | Five yes  |
| _locus_tag_BM28_RS08585_ | lytic murein transglycosylase                                 | Four yes  |

|                          |                                                                         |           |
|--------------------------|-------------------------------------------------------------------------|-----------|
| _locus_tag_BM28_RS08630_ | S41 family peptidase                                                    | Four yes  |
| _locus_tag_BM28_RS08915_ | ammonium transporter                                                    | Four yes  |
| _locus_tag_BM28_RS09105_ | _protein_hypothetical                                                   | Three yes |
| _locus_tag_BM28_RS09390_ | _protein_hypothetical                                                   | Five yes  |
| _locus_tag_BM28_RS09400_ | outer membrane lipoprotein carrier<br>protein LolA                      | Five yes  |
| _locus_tag_BM28_RS09450_ | membrane protein                                                        | Four yes  |
| _locus_tag_BM28_RS16950_ | _protein_hypothetical                                                   | Three yes |
| _locus_tag_BM28_RS09595_ | 3-ketoacyl-ACP reductase                                                | Four yes  |
| _locus_tag_BM28_RS09600_ | GMC family oxidoreductase                                               | Four yes  |
| _locus_tag_BM28_RS16970_ | _protein_hypothetical                                                   | Three yes |
| _locus_tag_BM28_RS09765_ | DUF1402 family protein                                                  | Five yes  |
| _locus_tag_BM28_RS09860_ | two-component sensor histidine kinase                                   | Five yes  |
| _locus_tag_BM28_RS09875_ | double-strand break repair protein AddB                                 | Four yes  |
| _locus_tag_BM28_RS09925_ | M48 family peptidase                                                    | Three yes |
| _locus_tag_BM28_RS10040_ | _protein_hypothetical                                                   | Five yes  |
| _locus_tag_BM28_RS10235_ | _protein_hypothetical                                                   | Three yes |
| _locus_tag_BM28_RS10280_ | _protein_hypothetical                                                   | Three yes |
| _locus_tag_BM28_RS10610  | lytic murein transglycosylase                                           | Three yes |
| _locus_tag_BM28_RS10675  | DUF882 domain-containing protein                                        | Five yes  |
| _locus_tag_BM28_RS10985  | flagellar basal body P-ring formation<br>protein FlgA                   | Four yes  |
| _locus_tag_BM28_RS11005  | flagellar basal body protein FlhL                                       | Five yes  |
| _locus_tag_BM28_RS11065  | autotransporter outer membrane<br>beta-barrel domain-containing protein | Four yes  |
| _locus_tag_BM28_RS11225  | insulinase family protein                                               | Three yes |
| _locus_tag_BM28_RS11470_ | nitrite reductase, copper-containing                                    | Five yes  |
| _locus_tag_BM28_RS11590_ | ABC transporter substrate-binding<br>protein                            | Five yes  |
| _locus_tag_BM28_RS11760_ | DUF3597 domain-containing protein                                       | Five yes  |
| _locus_tag_BM28_RS11800_ | hypothetical protein                                                    | Four yes  |
| _locus_tag_BM28_RS11875_ | peptidase S58 family protein                                            | Five yes  |
| _locus_tag_BM28_RS11945_ | cupredoxin domain-containing protein                                    | Three yes |
| _locus_tag_BM28_RS12075_ | peptide ABC transporter<br>substrate-binding protein                    | Four yes  |
| _locus_tag_BM28_RS12150_ | putative colanic acid biosynthesis<br>acetyltransferase                 | Four yes  |
| _locus_tag_BM28_RS12200_ | glutamate-1-semialdehyde<br>2,1-aminomutase                             | Four yes  |
| _locus_tag_BM28_RS12220_ | dTDP-4-dehydrorhamnose 3,5-epimerase                                    | Three yes |
| _locus_tag_BM28_RS12330_ | YeeE_YedE family protein                                                | Three yes |
| _locus_tag_BM28_RS17210_ | hypothetical protein                                                    | Three yes |
| _locus_tag_BM28_RS12725_ | DUF995 domain-containing protein                                        | Five yes  |
| _locus_tag_BM28_RS17245_ | hypothetical protein                                                    | Four yes  |
| _locus_tag_BM28_RS12780_ | hypothetical protein                                                    | Five yes  |
| _locus_tag_BM28_RS12865_ | invasion associated locus B family<br>protein                           | Four yes  |
| _locus_tag_BM28_RS12870_ | _ABC transporter substrate-binding                                      | Four yes  |

|                          |                                                                                                                 |            |
|--------------------------|-----------------------------------------------------------------------------------------------------------------|------------|
|                          | protein                                                                                                         |            |
| _locus_tag_BM28_RS17250_ | hypothetical protein                                                                                            | Four yes   |
| _locus_tag_BM28_RS12930_ | BA14K family protein                                                                                            | Three yes  |
| _locus_tag_BM28_RS13140_ | amidohydrolase                                                                                                  | Three yes  |
| _locus_tag_BM28_RS13240_ | sn-glycerol-3-phosphate ABC transporter<br>substrate-binding protein UgpB                                       | Four yes   |
| _locus_tag_BM28_RS13320_ | siderophore ABC transporter<br>substrate-binding protein                                                        | Four yes   |
| _locus_tag_BM28_RS13365_ | Ppx_GppA family phosphatase                                                                                     | Three yes  |
| _locus_tag_BM28_RS13370_ | RlmE family RNA methyltransferase                                                                               | Four yes   |
| _locus_tag_BM28_RS13460_ | hypothetical protein                                                                                            | Three yes  |
| _locus_tag_BM28_RS13535_ | ABC transporter substrate-binding<br>protein                                                                    | Four yes   |
| _locus_tag_BM28_RS17285_ | hypothetical protein                                                                                            | Four yes   |
| _locus_tag_BM28_RS13595_ | BA14K family protein                                                                                            | Four yes   |
| _locus_tag_BM28_RS13605_ | glycine betaine ABC transporter<br>substrate-binding protein                                                    | Four yes   |
| _locus_tag_BM28_RS13645_ | SDR family oxidoreductase                                                                                       | Five yes   |
| _locus_tag_BM28_RS13740_ | glutamine synthetase                                                                                            | Three yes  |
| _locus_tag_BM28_RS13785_ | glucose 1-dehydrogenase                                                                                         | Five yes   |
| _locus_tag_BM28_RS13935_ | nickel ABC transporter,<br>nickel_metallophore periplasmic binding<br>protein                                   | Four yes   |
| _locus_tag_BM28_RS14085_ | hypothetical protein                                                                                            | Three yes  |
| _locus_tag_BM28_RS14340_ | thioredoxin                                                                                                     | Five yes   |
| _locus_tag_BM28_RS14465_ | FdhF_YdeP family oxidoreductase                                                                                 | Four yes   |
| _locus_tag_BM28_RS14735_ | hypothetical protein                                                                                            | Four yes   |
| _locus_tag_BM28_RS14765_ | SDR family oxidoreductase                                                                                       | Four yes   |
| _locus_tag_BM28_RS14850_ | ABC transporter substrate-binding<br>protein                                                                    | Five yes   |
| _locus_tag_BM28_RS14865_ | TonB-dependent copper receptor                                                                                  | Five yes   |
| _locus_tag_BM28_RS15010_ | transglutaminase                                                                                                | Five yes   |
| _locus_tag_BM28_RS15080_ | SDR family oxidoreductase                                                                                       | Three yes  |
| _locus_tag_BM28_RS15085_ | penicillin-insensitive murein<br>endopeptidase                                                                  | Four yes   |
| _locus_tag_BM28_RS15175_ | bifunctional demethylmenaquinone<br>methyltransferase_2-methoxy-6-polypren<br>yl-1,4-benzoquinol methylase UbiE | Four yes   |
| _locus_tag_BM28_RS15375_ | ABC transporter substrate-binding<br>protein                                                                    | Four yes   |
| _locus_tag_BM28_RS15720_ | APC family permease                                                                                             | Five yes   |
| _locus_tag_BM28_RS17515_ | hypothetical protein                                                                                            | Three yes~ |

**Table S3 Putative TAT-substrates predicted by TAT-FIND.**

| <b>M28 locus tag</b>     | <b>Product</b>                                                |
|--------------------------|---------------------------------------------------------------|
| [locus_tag=BM28_RS00235] | [protein=hypothetical]                                        |
| [locus_tag=BM28_RS01600] | CAP domain-containing protein                                 |
| [locus_tag=BM28_RS02275] | guanylate kinase                                              |
| [locus_tag=BM28_RS02740] | L,D-transpeptidase                                            |
| [locus_tag=BM28_RS07325] | ubiquinol-cytochrome c reductase iron-sulfur subunit          |
| [locus_tag=BM28_RS01755] | twin-arginine translocation signal domain-containing protein  |
| [locus_tag=BM28_RS03675] | murein L,D-transpeptidase                                     |
| [locus_tag=BM28_RS00010] | DNA polymerase III subunit beta                               |
| [locus_tag=BM28_RS11540] | nitrous-oxide reductase                                       |
| [locus_tag=BM28_RS11570] | thiamine biosynthesis protein ApbE                            |
| [locus_tag=BM28_RS17000] | BMP family ABC transporter substrate-binding protein          |
| [locus_tag=BM28_RS13845] | ABC transporter substrate-binding protein                     |
| [locus_tag=BM28_RS11470] | nitrite reductase, copper-containing                          |
| [locus_tag=BM28_RS10730] | DUF1007 family protein                                        |
| [locus_tag=BM28_RS10375] | twin-arginine translocation signal domain-containing protein  |
| [locus_tag=BM28_RS15800] | aliphatic sulfonate ABC transporter substrate-binding protein |
| [locus_tag=BM28_RS11465] | lipase                                                        |
| [locus_tag=BM28_RS12110] | LPS biosynthesis protein                                      |
| [locus_tag=BM28_RS13455] | multicopper oxidase CueO                                      |
| [locus_tag=BM28_RS13965] | extracellular solute-binding protein                          |
| [locus_tag=BM28_RS14815] | protein-methionine-sulfoxide reductase catalytic subunit MsrP |
| [locus_tag=BM28_RS12380] | ABC transporter substrate-binding protein                     |
| [locus_tag=BM28_RS11590] | ABC transporter substrate-binding protein                     |
| [locus_tag=BM28_RS13140] | amidohydrolase                                                |
| [locus_tag=BM28_RS15630] | D-xylose ABC transporter substrate-binding protein            |



**Table S4 Putative TAT-substrates predicted by PRED-TAT.**

| <b>M28 locus tag</b> | <b>Product</b>                                                                                                            | <b>Note</b>                                                     |
|----------------------|---------------------------------------------------------------------------------------------------------------------------|-----------------------------------------------------------------|
| BM28_RS00045         | ABC transporter substrate-binding protein                                                                                 | Tat signal peptide predicted. Most likely cleavage site         |
| BM28_RS00235         | hypothetical protein                                                                                                      | Tat signal peptide predicted. Most likely cleavage site: 1 - 38 |
| BM28_RS01600         | CAP domain-containing protein]                                                                                            | Tat signal peptide predicted. Most likely cleavage site: 1 - 34 |
| BM28_RS01755         | twin-arginine translocation signal domain-containing protein                                                              | Tat signal peptide predicted. Most likely cleavage site: 1 - 34 |
| BM28_RS01860         | DsbA family protein                                                                                                       | Tat signal peptide predicted. Most likely cleavage site: 1 - 27 |
| BM28_RS02425         | DsbA family protein                                                                                                       | Tat signal peptide predicted. Most likely cleavage site: 1 - 29 |
| BM28_RS02740         | L,D-transpeptidase                                                                                                        | Tat signal peptide predicted. Most likely cleavage site: 1 - 29 |
| BM28_RS03245         | TIGR02301 family protein]                                                                                                 | Tat signal peptide predicted. Most likely cleavage site: 1 - 27 |
| BM28_RS03675         | murein L,D-transpeptidase                                                                                                 | Tat signal peptide predicted. Most likely cleavage site: 1 - 40 |
| BM28_RS05225         | LysR family transcriptional regulator]                                                                                    | Tat signal peptide predicted. Most likely cleavage site: 1 - 31 |
| BM28_RS05375         | Bifunctional 2-C-methyl-D-erythritol 4-phosphate cytidyltransferase/2-C-methyl-D-erythritol 2,4-cyclodiphosphate synthase | Tat signal peptide predicted. Most likely cleavage site: 1 - 55 |
| BM28_RS06600         | pyridoxine 5'-phosphate synthase                                                                                          | Tat signal peptide predicted. Most likely cleavage site: 1 - 38 |
| BM28_RS06975         | linear amide C-N hydrolase                                                                                                | Tat signal peptide predicted. Most likely cleavage site: 1 - 36 |
| BM28_RS07325         | ubiquinol-cytochrome c reductase iron-sulfur subunit                                                                      | Tat signal peptide predicted. Most likely cleavage site: 1 - 48 |
| BM28_RS08305         | thiamine/thiamine pyrophosphate ABC transporter permease ThiP                                                             | Tat signal peptide predicted. Most likely cleavage site: 1 - 40 |
| BM28_RS08910         | DNA translocase FtsK                                                                                                      | Tat signal peptide predicted. Most likely cleavage site: 1 - 63 |
| BM28_RS17000         | BMP family ABC transporter substrate-binding protein                                                                      | Tat signal peptide predicted. Most likely cleavage site: 1 - 32 |
| BM28_RS10375         | twin-arginine translocation signal domain-containing protein                                                              | Tat signal peptide predicted. Most likely cleavage site: 1 - 29 |
| BM28_RS11465         | Lipase                                                                                                                    | Tat signal peptide predicted. Most likely cleavage site: 1 - 25 |
| BM28_RS11470         | nitrite reductase, copper-containing                                                                                      | Tat signal peptide predicted. Most likely cleavage site: 1 - 42 |
| BM28_RS11540         | nitrous-oxide reductase                                                                                                   | Tat signal peptide predicted. Most likely cleavage site: 1 - 44 |
| BM28_RS11570         | thiamine biosynthesis protein ApbE                                                                                        | Tat signal peptide predicted. Most likely cleavage site: 1 - 27 |

|              |                                                               |                                                                 |
|--------------|---------------------------------------------------------------|-----------------------------------------------------------------|
| BM28_RS11590 | ABC transporter substrate-binding protein                     | Tat signal peptide predicted. Most likely cleavage site: 1 - 28 |
| BM28_RS11875 | peptidase S58 family protein                                  | Tat signal peptide predicted. Most likely cleavage site: 1 - 27 |
| BM28_RS12110 | LPS biosynthesis protein                                      | Tat signal peptide predicted. Most likely cleavage site: 1 - 51 |
| BM28_RS12380 | ABC transporter substrate-binding protein                     | Tat signal peptide predicted. Most likely cleavage site: 1 - 52 |
| BM28_RS12550 | thiol reductant ABC exporter subunit CydD                     | Tat signal peptide predicted. Most likely cleavage site: 1 - 57 |
| BM28_RS12730 | hypothetical protein                                          | Tat signal peptide predicted. Most likely cleavage site: 1 - 37 |
| BM28_RS13140 | Amidohydrolase                                                | Tat signal peptide predicted. Most likely cleavage site: 1 - 39 |
| BM28_RS13455 | multicopper oxidase CueO                                      | Tat signal peptide predicted. Most likely cleavage site: 1 - 29 |
| BM28_RS13760 | Hint domain-containing protein                                | Tat signal peptide predicted. Most likely cleavage site: 1 - 44 |
| BM28_RS13845 | ABC transporter substrate-binding protein                     | Tat signal peptide predicted. Most likely cleavage site: 1 - 30 |
| BM28_RS13965 | extracellular solute-binding protein                          | Tat signal peptide predicted. Most likely cleavage site: 1 - 25 |
| BM28_RS14670 | MetQ/NlpA family ABC transporter substrate-binding protein    | Tat signal peptide predicted. Most likely cleavage site: 1 - 37 |
| BM28_RS14815 | protein-methionine-sulfoxide reductase catalytic subunit MsrP | Tat signal peptide predicted. Most likely cleavage site: 1 - 49 |
| BM28_RS15630 | D-xylose ABC transporter substrate-binding protein            | Tat signal peptide predicted. Most likely cleavage site: 1 - 28 |

**Table S5 Comparisons of Tat substrates between *B. melitensis* M28 and other bacterial species.**

| Tat substrates in <i>B. melitensis</i> M28 | <i>E. coli</i>       |          | <i>Y. pstb</i> <sup>b</sup> |          | <i>P. aeruginosa</i> |          | <i>S. coelicolor</i> |          | <i>M. loti</i> <sup>c</sup> |          |
|--------------------------------------------|----------------------|----------|-----------------------------|----------|----------------------|----------|----------------------|----------|-----------------------------|----------|
|                                            | Homologous substrate | Identity | Homologous substrate        | Identity | Homologous substrate | Identity | Homologous substrate | Identity | Homologous substrate        | Identity |
| <b>Substrate/solute-binding protein</b>    |                      |          |                             |          |                      |          |                      |          |                             |          |
| A0009                                      | / <sup>a</sup>       | /        | /                           | /        | /                    | /        | SCO7677              | 21%      | mll5493                     | 54%      |
| A0376                                      | /                    | /        | /                           | /        | /                    | /        | /                    | /        | mlr5166                     | 55%      |
| B0279                                      | /                    | /        | /                           | /        | /                    | /        | /                    | /        | mll9181                     | 23%      |
| B0446                                      | /                    | /        | /                           | /        | /                    | /        | /                    | /        | mlr6082                     | 29%      |
| B0520                                      | /                    | /        | /                           | /        | /                    | /        | /                    | /        | /                           | /        |
| B0754                                      | /                    | /        | /                           | /        | /                    | /        | SCO7677              | 27%      | mlr3395                     | 74%      |
| B0779                                      | /                    | /        | /                           | /        | /                    | /        | /                    | /        | /                           | /        |
| B0934                                      | /                    | /        | /                           | /        | /                    | /        | /                    | /        | mll4794                     | 62%      |
| <b>Oxidoreductases</b>                     |                      |          |                             |          |                      |          |                      |          |                             |          |
| A0396                                      | /                    | /        | /                           | /        | /                    | /        | /                    | /        | mlr7525                     | 25%      |
| B0019                                      | YedY                 | 36%      | /                           | /        | PA4692               | 33%      | /                    | /        | mlr0879                     | 63%      |
| B0251                                      | /                    | /        | /                           | /        | PA2065               | 27%      | /                    | /        | mll3586                     | 27%      |
| B0672                                      | CueO                 | 40%      | PRK10965                    | 39%      | PA3768               | 28%      | /                    | /        | mll3586                     | 33%      |
| B0965                                      | YedY                 | 55%      | PRK05363                    | 54%      | PA4692               | 51%      | /                    | /        | mlr0879                     | 36%      |
| <b>Cell envelope biosynthesis</b>          |                      |          |                             |          |                      |          |                      |          |                             |          |
| A0577                                      | /                    | /        | /                           | /        | /                    | /        | /                    | /        | mll1519                     | 60%      |
| A0773                                      | /                    | /        | /                           | /        | /                    | /        | /                    | /        | mlr8397                     | 62%      |
| A1479                                      | /                    | /        | /                           | /        | /                    | /        | /                    | /        | /                           | /        |
| B0388                                      | /                    | /        | /                           | /        | /                    | /        | /                    | /        | /                           | /        |
| <b>Others</b>                              |                      |          |                             |          |                      |          |                      |          |                             |          |
| A0340                                      | /                    | /        | /                           | /        | /                    | /        | /                    | /        | mll8234                     | 44%      |
| B0340                                      | /                    | /        | /                           | /        | /                    | /        | /                    | /        | /                           | /        |
| B0737                                      | /                    | /        | /                           | /        | /                    | /        | /                    | /        | /                           | /        |
| RS03245                                    | /                    | /        | /                           | /        | /                    | /        | /                    | /        | /                           | /        |
| B0249                                      | /                    | /        | /                           | /        | /                    | /        | /                    | /        | /                           | /        |
| B0604                                      | /                    | /        | /                           | /        | /                    | /        | /                    | /        | /                           | /        |

a. "/" indicates that no homolog exist in that organism based on a BLASTP search of amino acid sequences.

b and c. Substrates of these bacteria were predicted by bioinformatics, but not verified experimentally.

**Table S6 Strains and plasmids used in this study.**

| Strains and plasmids    | Description                                                                                                                                                                         | Source or reference |
|-------------------------|-------------------------------------------------------------------------------------------------------------------------------------------------------------------------------------|---------------------|
| Strains                 |                                                                                                                                                                                     |                     |
| <i>B.melitensis</i> M28 | Parental strain;smooth phenotype                                                                                                                                                    | Our lab stock       |
| ΔtatA                   | Deletion strain for <i>tatA</i> gene, km <sup>r</sup>                                                                                                                               | This study          |
| ΔA0009                  | Deletion strain for A0009 gene, km <sup>r</sup>                                                                                                                                     | This study          |
| ΔA0340                  | Deletion strain for A0340 gene, km <sup>r</sup>                                                                                                                                     | This study          |
| ΔA0376                  | Deletion strain for A0376 gene, km <sup>r</sup>                                                                                                                                     | This study          |
| ΔA0396                  | Deletion strain for A0396 gene, km <sup>r</sup>                                                                                                                                     | This study          |
| ΔA0577                  | Deletion strain for A0577 gene, km <sup>r</sup>                                                                                                                                     | This study          |
| ΔRS03245                | Deletion strain for RS03245 gene, km <sup>r</sup>                                                                                                                                   | This study          |
| ΔA0773                  | Deletion strain for A0773 gene, km <sup>r</sup>                                                                                                                                     | This study          |
| ΔA1479                  | Deletion strain for A1479 gene, km <sup>r</sup>                                                                                                                                     | This study          |
| ΔB0019                  | Deletion strain for B0019 gene, km <sup>r</sup>                                                                                                                                     | This study          |
| ΔB0249                  | Deletion strain for B0249 gene, km <sup>r</sup>                                                                                                                                     | This study          |
| ΔB0251                  | Deletion strain for B0251 gene, km <sup>r</sup>                                                                                                                                     | This study          |
| ΔB0279                  | Deletion strain for B0279 gene, km <sup>r</sup>                                                                                                                                     | This study          |
| ΔB0340                  | Deletion strain for B0340 gene, km <sup>r</sup>                                                                                                                                     | This study          |
| ΔB0446                  | Deletion strain for B0446 gene, km <sup>r</sup>                                                                                                                                     | This study          |
| ΔB0520                  | Deletion strain for B0520 gene, km <sup>r</sup>                                                                                                                                     | This study          |
| ΔB0604                  | Deletion strain for B0604 gene, km <sup>r</sup>                                                                                                                                     | This study          |
| ΔB0672                  | Deletion strain for B0672 gene, km <sup>r</sup>                                                                                                                                     | This study          |
| ΔB0737                  | Deletion strain for B0737 gene, km <sup>r</sup>                                                                                                                                     | This study          |
| ΔB0754                  | Deletion strain for B0754 gene, km <sup>r</sup>                                                                                                                                     | This study          |
| ΔB0779                  | Deletion strain for B0779 gene, km <sup>r</sup>                                                                                                                                     | This study          |
| ΔB0934                  | Deletion strain for B0934 gene, km <sup>r</sup>                                                                                                                                     | This study          |
| ΔB0965                  | Deletion strain for B0965 gene, km <sup>r</sup>                                                                                                                                     | This study          |
| ΔB1133                  | Deletion strain for B1133 gene, km <sup>r</sup>                                                                                                                                     | This study          |
| M28ΔtatApBBRtatA        | ΔtatA strain carrying the plasmid pBBR-tatA, Amp <sup>r</sup>                                                                                                                       | This study          |
| E.coli strains          |                                                                                                                                                                                     |                     |
| DH5α                    | F <sup>-</sup> Φ80lacZΔM15 Δ(lacZYA-argF) U169 <i>recA1 endA1 hsdR17</i> (rk <sup>-</sup> , mk <sup>+</sup> ) <i>phoA</i> supE44 <i>thi-1 gyrA96 relA1 λ-</i>                       | Invitrogen          |
| MC 4100                 | F <sup>-</sup> Δlac U169 <i>araD139 rpsL150 relA1 ptsFrbs flb5301</i>                                                                                                               | Our lab stock       |
| MC4100ΔssamiAC          | as MC4100, <i>amiA</i> Δ2–33, <i>amiC</i> Δ2–32                                                                                                                                     | This study          |
| MC4100ΔtatC             | deletion strain for <i>tatC</i> gene                                                                                                                                                | This study          |
| Plasmid                 |                                                                                                                                                                                     |                     |
| pSP72                   | suicide vector, Amp <sup>r</sup>                                                                                                                                                    | [1]                 |
| pBBR1MCS4               | Broad-host range cloning vector;Amp <sup>r</sup>                                                                                                                                    | [2]                 |
| pSP72-Ptat              | pT7.5-similar vectorallowing constitutive expression under the control of the <i>Brucella tat</i> promoter or inducible expression from the upstream T7promoter (Amp <sup>r</sup> ) | This study          |
| pssAmiA-AmiAH           | ssAmiA fused to mature AmiA carrying a C-terminal hexa histidine tag in pSP72-Ptat                                                                                                  | This study          |
| pssA0009-AmiAH          | As pssAmiA-AmiAH but where AmiA signal peptide has beenreplaced by BM28_ A0009 signal peptide                                                                                       | This study          |
| pss A0340-AmiAH         | As pssAmiA-AmiAH but where AmiA signal peptide has beenreplaced by                                                                                                                  | This study          |

---

|                  |                                                                    |            |
|------------------|--------------------------------------------------------------------|------------|
|                  | BM28_A0340signal peptide                                           |            |
| pss A0376-AmiAH  | As pssAmiA-AmiAH but where AmiA signal peptide has beenreplaced by | This study |
|                  | BM28_A0376signal peptide                                           |            |
| pss A0396-AmiAH  | As pssAmiA-AmiAH but where AmiA signal peptide has beenreplaced by | This study |
|                  | BM28_A0396signal peptide                                           |            |
| pss A0577-AmiAH  | As pssAmiA-AmiAH but where AmiA signal peptide has beenreplaced by | This study |
|                  | BM28_A0577signal peptide                                           |            |
| pssRS03245-AmiAH | As pssAmiA-AmiAH but where AmiA signal peptide has beenreplaced by | This study |
|                  | BM28_RS03245signal peptide                                         |            |
| pss A0773-AmiAH  | As pssAmiA-AmiAH but where AmiA signal peptide has beenreplaced by | This study |
|                  | BM28_A0773signal peptide                                           |            |
| pss A1479-AmiAH  | As pssAmiA-AmiAH but where AmiA signal peptide has beenreplaced by | This study |
|                  | BM28_A1479signal peptide                                           |            |
| pss B0019-AmiAH  | As pssAmiA-AmiAH but where AmiA signal peptide has beenreplaced by | This study |
|                  | BM28_B0019signal peptide                                           |            |
| pss B0249-AmiAH  | As pssAmiA-AmiAH but where AmiA signal peptide has beenreplaced by | This study |
|                  | BM28_B0249signal peptide                                           |            |
| pss B0251-AmiAH  | As pssAmiA-AmiAH but where AmiA signal peptide has beenreplaced by | This study |
|                  | BM28_B0251signal peptide                                           |            |
| pss B0279-AmiAH  | As pssAmiA-AmiAH but where AmiA signal peptide has beenreplaced by | This study |
|                  | BM28_B0279signal peptide                                           |            |
| pss B0340-AmiAH  | As pssAmiA-AmiAH but where AmiA signal peptide has beenreplaced by | This study |
|                  | BM28_B0340signal peptide                                           |            |
| pss B0388-AmiAH  | As pssAmiA-AmiAH but where AmiA signal peptide has beenreplaced by | This study |
|                  | BM28_B0388signal peptide                                           |            |
| pss B0446-AmiAH  | As pssAmiA-AmiAH but where AmiA signal peptide has beenreplaced by | This study |
|                  | BM28_B0446signal peptide                                           |            |
| pss B0520-AmiAH  | As pssAmiA-AmiAH but where AmiA signal peptide has beenreplaced by | This study |
|                  | BM28_B0520signal peptide                                           |            |
| pss B0604-AmiAH  | As pssAmiA-AmiAH but where AmiA signal peptide has beenreplaced by | This study |
|                  | BM28_B0604signal peptide                                           |            |
| pss B0672-AmiAH  | As pssAmiA-AmiAH but where AmiA signal peptide has beenreplaced by | This study |
|                  | BM28_B0672signal peptide                                           |            |
| pss B0737-AmiAH  | As pssAmiA-AmiAH but where AmiA signal peptide has beenreplaced by | This study |
|                  | BM28_B0737signal peptide                                           |            |
| pss B0754-AmiAH  | As pssAmiA-AmiAH but where AmiA signal peptide has beenreplaced by | This study |
|                  | BM28_B0754signal peptide                                           |            |
| pss B0779-AmiAH  | As pssAmiA-AmiAH but where AmiA signal peptide has beenreplaced by | This study |
|                  | BM28_B0779signal peptide                                           |            |
| pss B0934-AmiAH  | As pssAmiA-AmiAH but where AmiA signal peptide has beenreplaced by | This study |
|                  | BM28_B0934signal peptide                                           |            |
| pss B0965-AmiAH  | As pssAmiA-AmiAH but where AmiA signal peptide has beenreplaced by | This study |
|                  | BM28_B0965signal peptide                                           |            |
| pss B1133-AmiAH  | As pssAmiA-AmiAH but where AmiA signal peptide has beenreplaced by | This study |
|                  | BM28_B1133signal peptide                                           |            |
| pss A0515-AmiAH  | As pssAmiA-AmiAH but where AmiA signal peptide has beenreplaced by | This study |
|                  | BM28_A0515signal peptide                                           |            |
| pss A1551-AmiAH  | As pssAmiA-AmiAH but where AmiA signal peptide has beenreplaced by | This study |
|                  | BM28_A1551signal peptide                                           |            |

---

---

|                 |                                                                                                |            |
|-----------------|------------------------------------------------------------------------------------------------|------------|
| pss A1757-AmiAH | As pssAmiA-AmiAH but where AmiA signal peptide has beenreplaced by<br>BM28_A1757signal peptide | This study |
| pss A1724-AmiAH | As pssAmiA-AmiAH but where AmiA signal peptide has beenreplaced by<br>BM28_A1724signal peptide | This study |

---

**Table S7 Primers used in this study**

| Primer      | Nucleotide sequence(5' -3' )                  | Purpose of use                       |
|-------------|-----------------------------------------------|--------------------------------------|
| A0889-HA1-F | caggtcgactctagaggatccCCTCGCCGGTGACGCTTG       | Amplification of upstream            |
| A0889-HA1-R | ATTATTCCTCTCAGTGCCGCC                         | homologous arm                       |
| A0889-Km-F  | gcggcactgagaggaataaTTCAAATATGTATCCGCTCATGAGA  | Amplification of Kan                 |
| A0889-Km-R  | ccggaaggaTCAGAAGAACTCGTCAAGAAGGC              | Resistance Gene                      |
| A0889-HA2-F | agttcttctgaTCCTTCCGGGATGAACTGC                | Amplification of                     |
| A0889-HA2-R | tctgatatcatcgaattcCTGTTTTGCGAAAGCAAAGCA       | downstream homologous arm            |
| TatA-COM-F  | cgctctagaactagtgatccAATTGCGCGGCGCAGGGC        | Amplification of <i>tatA</i> and its |
| TatA-COM-R  | gataagcttgatcgaattcTCAGGACTTGGTGGTCTTCTTGA    | promoter region                      |
| A0577-HA1-F | caggtcgactctagaggatccGCTTATAGCGATTTCTGGAAACTG | Amplification of upstream            |
| A0577-HA1-R | gcggatacatattgaaATGAAAACCAAGATTGATGATGGG      | homologous arm                       |
| A0577-Km-F  | catTTCAAATATGTATCCGCTCATGAGA                  | Amplification of Kan                 |
| A0577-Km-R  | cctactgcctaaacTCAGAAGAACTCGTCAAGAAGGC         | Resistance Gene                      |
| A0577-HA2-F | tctgaGTTTAGGGCAGTAGGGCTGTAGG                  | Amplification of                     |
| A0577-HA2-R | tctgatatcatcgaattcGTCGGCATCTATTTCGTCACG       | downstream homologous arm            |
| A0396-HA1-F | caggtcgactctagaggatccGGACCGATGCTCACGTTTTTC    | Amplification of upstream            |
| A0396-HA1-R | gaaGAGCTTTCTCCTTTGCCCGA                       | homologous arm                       |
| A0396-Km-F  | ggcaaaggagaaagctcTTCAAATATGTATCCGCTCATGAGA    | Amplification of Kan                 |
| A0396-Km-R  | atcccaggaTCAGAAGAACTCGTCAAGAAGGC              | Resistance Gene                      |
| A0396-HA2-F | ttcttctgaTCCTGCGGGATAAAAGGGC                  | Amplification of                     |
| A0396-HA2-R | tctgatatcatcgaattcCAGGTGCGCAGGATTATCGC        | downstream homologous arm            |
| A0773-HA1-F | caggtcgactctagaggatccTGGAGGCTCTCCAGCTTGTC     | Amplification of upstream            |
| A0773-HA1-R | TTGATTAACGTCCCAAAAGGCT                        | homologous arm                       |
| A0773-Km-F  | cctttgggacgttaatacaTTCAAATATGTATCCGCTCATGAGA  | Amplification of Kan                 |
| A0773-Km-R  | gacgcaaTCAGAAGAACTCGTCAAGAAGGC                | Resistance Gene                      |
| A0773-HA2-F | cgagttcttctgaTTGCGTCAAAAACCACTGTT             | Amplification of                     |
| A0773-HA2-R | tctgatatcatcgaattcAATAGGCCGTGCCGCCTG          | downstream homologous arm            |
| B0249-HA1-F | caggtcgactctagaggatccCCAGGTGCGGATAAAGGATATG   | Amplification of upstream            |
| B0249-HA1-R | ttgaaCCTGTCTGTTTCGGCAGCA                      | homologous arm                       |

|             |                                              |                                                  |
|-------------|----------------------------------------------|--------------------------------------------------|
| B0249-Km-F  | gccgaaacagacaggTTCAAATATGTATCCGCTCATGAGA     | Amplification of Kan<br>Resistance Gene          |
| B0249-Km-R  | cgcagcgttTCAGAAGAACTCGTCAAGAAGGC             |                                                  |
| B0249-HA2-F | agttcttctgaAACGCTGCGCTCAGCCAA                | Amplification of<br>downstream homologous<br>arm |
| B0249-HA2-R | tctgatatcatc gatgaattcAATCGTCTGATGCACGACC    |                                                  |
| B0019-HA1-F | caggtcgactctagaggatccGACAATTGATTTACCGCCAGCG  | Amplification of upstream<br>homologous arm      |
| B0019-HA1-R | ttgaaGATTGTTTTCTCCGTCTTTTCGTCC               |                                                  |
| B0019-Km-F  | gacggagaacaatcTTCAAATATGTATCCGCTCATGAGA      | Amplification of Kan<br>Resistance Gene          |
| B0019-Km-R  | gatccggtacTCAGAAGAACTCGTCAAGAAGGC            |                                                  |
| B0019-HA2-F | gttcttctgaGTACCGGATCGGGCGGCT                 | Amplification of<br>downstream homologous<br>arm |
| B0019-HA2-R | tctgatatcatc gatgaattcACGCTTATCGGGCAAGCC     |                                                  |
| B0279-HA1-F | caggtcgactctagaggatccGTTTCTGGCGCAGCTCGG      | Amplification of upstream<br>homologous arm      |
| B0279-HA1-R | tttgaGGTTTCCTCCTACGATATTGTCCG                |                                                  |
| B0279-Km-F  | cgtaggaggaaccTTCAAATATGTATCCGCTCATGAGA       | Amplification of Kan<br>Resistance Gene          |
| B0279-Km-R  | tggaccggaTCAGAAGAACTCGTCAAGAAGGC             |                                                  |
| B0279-HA2-F | agttcttctgaTCCGGTCCAGCTTCAAAACC              | Amplification of<br>downstream homologous<br>arm |
| B0279-HA2-R | tctgatatcatc gatgaattcTCATGATCGCCAATTTCCG    |                                                  |
| A1479-HA1-F | caggtcgactctagaggatccACTTCAAGGCCTGCCTTCAAC   | Amplification of upstream<br>homologous arm      |
| A1479-HA1-R | aGATGACCTCATTCATCCGCAA                       |                                                  |
| A1479-Km-F  | gcgatgaatgaggtcatcTTCAAATATGTATCCGCTCATGAGA  | Amplification of Kan<br>Resistance Gene          |
| A1479-Km-R  | atggtcgcTCAGAAGAACTCGTCAAGAAGGC              |                                                  |
| A1479-HA2-F | agttcttctgaGGCGACCATGAAAAAGGCG               | Amplification of<br>downstream homologous<br>arm |
| A1479-HA2-R | tctgatatcatc gatgaattcAGGCAAAATCACCAGCACGC   |                                                  |
| B0779-HA1-F | caggtcgactctagaggatccATGAAACTGCGCCTGCTCAA    | Amplification of upstream<br>homologous arm      |
| B0779-HA1-R | tttgaGTTCTGACCTCCCGTCATATC                   |                                                  |
| B0779-Km-F  | ggggaggtcagaacTTCAAATATGTATCCGCTCATGAGA      | Amplification of Kan<br>Resistance Gene          |
| B0779-Km-R  | cggtttgTCAGAAGAACTCGTCAAGAAGGC               |                                                  |
| B0779-HA2-F | cgagttcttctgaCAAACCGTAAACGGCCAAG             | Amplification of<br>downstream homologous<br>arm |
| B0779-HA2-R | tctgatatcatc gatgaattcGATTGCGATATCCATAAATTCG |                                                  |
| A0376-HA1-F | caggtcgactctagaggatccATCAACGGTCGCCTCAACC     | Amplification of upstream<br>homologous arm      |
| A0376-HA1-R | atttgaGTCTCTCCTCCTCAATATATGTTGTTTT           |                                                  |



|             |                                               |                                                  |
|-------------|-----------------------------------------------|--------------------------------------------------|
| A0376-Km-F  | gaggaggagagacTTCAAATATGTATCCGCTCATGAGA        | Amplification of Kan<br>Resistance Gene          |
| A0376-Km-R  | gaaactTCAGAAGAAGGCTCGTCAAGAAGGC               |                                                  |
| A0376-HA2-F | cgagttctctgaACGTTTCAACACTTGATTGGAACA          | Amplification of<br>downstream homologous<br>arm |
| A0376-HA2-R | tctgatatcatcgaattcAAGGCACGTTACGCGATATCG       |                                                  |
| B0251-HA1-F | caggctgactctagaggatccGTGTGAATGCGCATGTGCAA     | Amplification of upstream<br>homologous arm      |
| B0251-HA1-R | gaaCGTTTCTCTCTTTGCGATAGG                      |                                                  |
| B0251-Km-F  | cgcaaaggagagaaacgTTCAAATATGTATCCGCTCATGAGA    | Amplification of Kan<br>Resistance Gene          |
| B0251-Km-R  | cgcTCAGAAGAAGGCTCGTCAAGAAGGC                  |                                                  |
| B0251-HA2-F | ttgacgagttctctgaGCGCCCGTGAACAGGGG             | Amplification of<br>downstream homologous<br>arm |
| B0251-HA2-R | tctgatatcatcgaattcCAGGTTTGGCTCCATTC           |                                                  |
| B0446-HA1-F | caggctgactctagaggatccCTTCCGGCGCTTCTTTCTTA     | Amplification of upstream<br>homologous arm      |
| B0446-HA1-R | ttgaaTTCGCGTGCAGATCCCA                        |                                                  |
| B0446-Km-F  | gatctgcaccgggaaTTCAAATATGTATCCGCTCATGAGA      | Amplification of Kan<br>Resistance Gene          |
| B0446-Km-R  | tgccagagagTCAGAAGAAGGCTCGTCAAGAAGGC           |                                                  |
| B0446-HA2-F | gttctctgaCTCTCTGGCATGATGGGGC                  | Amplification of<br>downstream homologous<br>arm |
| B0446-HA2-R | tctgatatcatcgaattcCATGGCTTCTTACGCATCA         |                                                  |
| B0604-HA1-F | caggctgactctagaggatccCAATTCGGATATACAAAATCGCA  | Amplification of upstream<br>homologous arm      |
| B0604-HA1-R | tatttgaaGGGAGACACCCCAATAITTTG                 |                                                  |
| B0604-Km-F  | ggggtgtctcccTTCAAATATGTATCCGCTCATGAGA         | Amplification of Kan<br>Resistance Gene          |
| B0604-Km-R  | aaggctcggTCAGAAGAAGGCTCGTCAAGAAGGC            |                                                  |
| B0604-HA2-F | gttctctgaCCGAAGCCTTCTCATGCAAA                 | Amplification of<br>downstream homologous<br>arm |
| B0604-HA2-R | tctgatatcatcgaattcCGAAAACGTTGCCGAGGA          |                                                  |
| A0009-HA1-F | caggctgactctagaggatccAGTACAAGCGCATCAACAGCTATT | Amplification of upstream<br>homologous arm      |
| A0009-HA1-R | ttgaaTCTCGTTCAGGCTCATGCA                      |                                                  |
| A0009-Km-F  | gaggcctgaacgagaTTCAAATATGTATCCGCTCATGAGA      | Amplification of Kan<br>Resistance Gene          |
| A0009-Km-R  | ccggtaaTCAGAAGAAGGCTCGTCAAGAAGGC              |                                                  |
| A0009-HA2-F | cgagttctctgaTTACCGGAAAGTGGCGATCC              | Amplification of<br>downstream homologous<br>arm |
| A0009-HA2-R | tctgatatcatcgaattcTCATCTGCGGAAATCGG           |                                                  |
| A0340-HA1-F | caggctgactctagaggatccATCCATCCTGCTCATCCCCT     | Amplification of upstream                        |

|               |                                              |                           |
|---------------|----------------------------------------------|---------------------------|
| A0340-HA1-R   | tgaaTGGCTGACTGTATCTGATGTATCGC                | homologous arm            |
| A0340-Km-F    | cagatacagtcagccaTTCAAATATGTATCCGCTCATGAGA    | Amplification of Kan      |
| A0340-Km-R    | cgaaacTCAGAAGAACTCGTCAAGAAGGC                | Resistance Gene           |
| A0340-HA2-F   | cgagttctctgaGGTTTCGTTTCTCCTGACAGGTT          | Amplification of          |
| A0340-HA2-R   | tctgatatcatcgatgaattcCAAGTTCCAGTCCCAGAACGAT  | downstream homologous arm |
| A0965-HA1-F   | caggtcgactctagaggatccCCAAATCTTCGTGGCAAGCG    | Amplification of upstream |
| A0965-HA1-R   | atttgaaGGGGCGTTCTCACTTCTTTTC                 | homologous arm            |
| A0965-Km-F    | gtgagaacgccccTTCAAATATGTATCCGCTCATGAGA       | Amplification of Kan      |
| A0965-Km-R    | gccatgTCAGAAGAACTCGTCAAGAAGGC                | Resistance Gene           |
| A0965-HA2-F   | acgagttctctgaCATGGCGGCGCAACC                 | Amplification of          |
| A0965-HA2-R   | tctgatatcatcgatgaattcGGTTCCTGTTTCAATAGAACCGC | downstream homologous arm |
| B0672-HA1-F   | caggtcgactctagaggatccTGCCGATCATGCTTGCCG      | Amplification of upstream |
| B0672-HA1-R   | ttgaaGATAAGTCTCCAGACAATAATCGTCATT            | homologous arm            |
| B0672-Km-F    | gtctggagacttateTTCAAATATGTATCCGCTCATGAGA     | Amplification of Kan      |
| B0672-Km-R    | gccttgctcTCAGAAGAACTCGTCAAGAAGGC             | Resistance Gene           |
| B0672-HA2-F   | agttctctgaGAGCAAGGCCCGATGCGC                 | Amplification of          |
| B0672-HA2-R   | tctgatatcatcgatgaattcACCACTAGAAATTGGGCATGGC  | downstream homologous arm |
| B0754-HA1-F   | caggtcgactctagaggatccGCAAGGCGCATGAAATTGA     | Amplification of upstream |
| B0754-HA1-R   | tatttgaaGCTTACCGCCCCAATTTTCT                 | homologous arm            |
| B0754-Km-F    | ggggcgtaagcTTCAAATATGTATCCGCTCATGAGA         | Amplification of Kan      |
| B0754-Km-R    | ccggttgcttcaTCAGAAGAACTCGTCAAGAAGGC          | Resistance Gene           |
| B0754-HA2-F   | tcttctgaTGAAGCAACCGGATTGATTGT                | Amplification of          |
| B0754-HA2-R   | tctgatatcatcgatgaattcCAGCATGGAAGCAGCCTGC     | downstream homologous arm |
| RS03245-HA1-F | caggtcgactctagaggatccACCGCAAGAATGGCGAG       | Amplification of upstream |
| RS03245-HA1-R | ttgaaTCATCAACCTCTTGCTTGAACG                  | homologous arm            |
| RS03245-Km-F  | gcaagaggttgatgTTCAAATATGTATCCGCTCATGAGA      | Amplification of Kan      |
| RS03245-Km-R  | ggTCAGAAGAACTCGTCAAGAAGGC                    | Resistance Gene           |
| RS03245-HA2-F | cttgacgagttctctgaCCATTCATTCCTTGTGCGG         | Amplification of          |
| RS03245-HA2-R | tctgatatcatcgatgaattcCTGTGCGAAATCCCGGTGAA    | downstream homologous arm |

|             |                                              |                                                               |
|-------------|----------------------------------------------|---------------------------------------------------------------|
| B0340-HA1-F | caggtcgactctagaggatccACCAATGGCCTCGTACTTTCCG  | Amplification of upstream homologous arm                      |
| B0340-HA1-R | tttgaaGAACGATCCTCCCCCGATC                    |                                                               |
| B0340-Km-F  | ggggaggatcgttcTTCAAATATGTATCCGCTCATGAGA      | Amplification of Kan Resistance Gene                          |
| B0340-Km-R  | gtggTCAGAAGAAGCTCGTCAAGAAGGC                 |                                                               |
| B0340-HA2-F | tgacgagttcttctgaCCACGCGCCCAGCCGACG           | Amplification of downstream homologous arm                    |
| B0340-HA2-R | tctgatatcatc gatgaattcCAATGCCTCGGTATCGACCG   |                                                               |
| B0737-HA1-F | caggtcgactctagaggatccTGCATCAATATTTGGTATGCGC  | Amplification of upstream homologous arm                      |
| B0737-HA1-R | gaaAAATCCCTCCGCTCTTCCG                       |                                                               |
| B0737-Km-F  | gaagagcggaggatTTCAAATATGTATCCGCTCATGAGA      | Amplification of Kan Resistance Gene                          |
| B0737-Km-R  | ccccggttcagaatgatTCAGAAGAAGCTCGTCAAGAAGGC    |                                                               |
| B0737-HA2-F | gaATCATTCTGAAACCGGGGTCG                      | Amplification of downstream homologous arm                    |
| B0737-HA2-R | tctgatatcatc gatgaattcTCCTCATCTCGCGCTGTC     |                                                               |
| B0520-HA1-F | caggtcgactctagaggatccACGTGCAACAATGTGCGCGC    | Amplification of upstream homologous arm                      |
| B0520-HA1-R | ttgaaGACATGCCTCCTGTCTTCTTGTATG               |                                                               |
| B0520-Km-F  | gacaggaggcatgtcTTCAAATATGTATCCGCTCATGAGA     | Amplification of Kan Resistance Gene                          |
| B0520-Km-R  | ccggttcgatttttaTCAGAAGAAGCTCGTCAAGAAGGC      |                                                               |
| B0520-HA2-F | ctgaTAAAAATGCGAACCGGCTTG                     | Amplification of downstream homologous arm                    |
| B0520-HA2-R | tctgatatcatc gatgaattcTGGATTGATCGGCGGCTG     |                                                               |
| B0934-HA1-F | caggtcgactctagaggatccTGCGAATCTGCAATATCATGTGC | Amplification of upstream homologous arm                      |
| B0934-HA1-R | gaaTTTTTGTTTCCTTGCTGTAGAATTCT                |                                                               |
| B0934-Km-F  | cagcaaggaacaaaaTTCAAATATGTATCCGCTCATGAGA     | Amplification of Kan Resistance Gene                          |
| B0934-Km-R  | gggatgaTCAGAAGAAGCTCGTCAAGAAGGC              |                                                               |
| B0934-HA2-F | cgagttcttctgaTCATCCCCAAAACAGAAAGTCC          | Amplification of downstream homologous arm                    |
| B0934-HA2-R | tctgatatcatc gatgaattcTGGAACACCATGCCAATGC    |                                                               |
| Qpcr-16s-F  | CCGACGGCTAACATTTCATCG                        | Housekeeping gene                                             |
| Qpcr-16s-R  | CATTACTGACGCTGAGGTGC                         |                                                               |
| Qpcr-tatB-F | CAACGAGTTTCGCCATCAATTC                       | Detection of transcription level of tatB in M28 $\Delta$ tatA |
| Qpcr-tatB-R | TCAAGGCTTCTGGCTTCATC                         |                                                               |
| Qpcr-tatC-F | CTTGCCGACGATCCTTCTTTA                        | Detection of transcription level of tatC in M28 $\Delta$ tatA |
| Qpcr-tatC-R | GGTGGAGGAAGCGTTGTTAT                         |                                                               |

## References

- [1]: Peng Y , Kumar S , Hernandez R L , et al. Evidence for the Transport of Maltose by the Sucrose Permease, CscB, of Escherichia coli [J]. Journal of Membrane Biology, 2009, 228(2):79-88.
- [2]: Kovach ME, Elzer PH, Hill DS, Robertson GT, Roop RM, II, Peterson KM. Four new derivatives of the broad-host-range cloning vector pBBR1MCS, carrying different antibiotic-resistance cassettes [J]. Gene, 1995, 166:175–17.
